# Supplementary material
Source: publisher site journal article supplement (https://www.dovepress.com/article/303362)
Supplement: Supplementary file 1 [file get_supplementary_file.php]

**Supplementary Table 1 Final instruments adopted for circulating MCP1**

| **Phenotype** | **SNP** | **other_allele** | **effect_allele** | **Beta_ MCP1** | **se_ MCP1** | **F-statistic** | **Beta_CAD** | **Se_ CAD** |
| --- | --- | --- | --- | --- | --- | --- | --- | --- |
| mcp1 | rs3027001 | T | C | -0.1415 | 0.0193 | 53.8 | -0.01744 | 0.012267 |
| mcp1 | rs12045356 | T | G | -0.1522 | 0.0215 | 50.1 | -0.01679 | 0.012098 |
| mcp1 | rs2262422 | A | G | -0.1063 | 0.0176 | 36.5 | -0.01387 | 0.011669 |
| mcp1 | rs183012206 | A | G | 0.1739 | 0.0249 | 48.8 | 0.016909 | 0.014691 |
| mcp1 | rs34448772 | A | G | 0.1467 | 0.0189 | 60.2 | 0.01382 | 0.01211 |
| mcp1 | rs11265178 | A | C | -0.0968 | 0.0159 | 37.1 | -0.00988 | 0.009525 |
| mcp1 | rs2427828 | A | G | -0.1036 | 0.0187 | 30.7 | -0.01008 | 0.010266 |
| mcp1 | rs863006 | A | G | -0.1945 | 0.0155 | 157.5 | -0.01026 | 0.00972 |
| mcp1 | rs863002 | T | C | -0.1135 | 0.0159 | 51.0 | -0.00959 | 0.009958 |
| mcp1 | rs863005 | T | C | 0.1692 | 0.0188 | 81.0 | 0.009649 | 0.011275 |
| mcp1 | rs12134665 | T | G | -0.1046 | 0.0176 | 35.3 | -0.00823 | 0.01053 |
| mcp1 | rs35333710 | A | G | -0.1476 | 0.0268 | 30.3 | -0.01142 | 0.016224 |
| mcp1 | rs863007 | T | G | -0.0903 | 0.0158 | 32.7 | -0.00028 | 0.009501 |
| mcp1 | rs62245103 | T | G | -0.2371 | 0.0417 | 32.3 | -0.09095 | 0.030035 |
| mcp1 | rs62246138 | A | G | -0.2929 | 0.0466 | 39.5 | -0.07016 | 0.029659 |
| mcp1 | rs2097276 | T | G | -0.1193 | 0.0203 | 34.5 | -0.02363 | 0.012645 |
| mcp1 | rs12489420 | T | C | -0.1045 | 0.0157 | 44.3 | -0.01761 | 0.009192 |
| mcp1 | rs34354138 | T | G | 0.1012 | 0.0164 | 38.1 | 0.014109 | 0.009525 |
| mcp1 | rs3774641 | T | G | -0.1324 | 0.0191 | 48.1 | -0.0148 | 0.01085 |
| mcp1 | rs17388512 | A | G | 0.1027 | 0.0163 | 39.7 | -0.01902 | 0.009699 |
| mcp1 | rs11919400 | A | G | 0.1201 | 0.0181 | 44.0 | -0.02133 | 0.011529 |
| mcp1 | rs116425179 | A | G | 0.1476 | 0.0255 | 33.5 | 0.024512 | 0.02235 |
| mcp1 | rs12639314 | A | C | 0.1121 | 0.0198 | 32.1 | -0.01366 | 0.011682 |
| mcp1 | rs35280891 | A | G | -0.153 | 0.0222 | 47.5 | -0.00788 | 0.013254 |
| mcp1 | rs148113740 | T | C | -0.3132 | 0.0464 | 45.6 | 0.01684 | 0.028298 |
| mcp1 | rs62243914 | A | G | -0.2481 | 0.0318 | 60.9 | 0.007845 | 0.015269 |
| mcp1 | rs71615437 | A | G | 0.1525 | 0.0242 | 39.7 | -0.00712 | 0.015067 |
| mcp1 | rs148924893 | A | G | -0.2249 | 0.0401 | 31.5 | -0.01161 | 0.028822 |
| mcp1 | rs75347153 | A | G | -0.244 | 0.0404 | 36.5 | 0.014676 | 0.039076 |
| mcp1 | rs13065964 | A | G | 0.0894 | 0.0157 | 32.4 | 0.002265 | 0.009208 |
| mcp1 | rs12493471 | T | C | -0.1163 | 0.0162 | 51.5 | -0.00202 | 0.010059 |
| mcp1 | rs35060576 | A | G | -0.0955 | 0.0162 | 34.8 | -0.00185 | 0.009861 |
| mcp1 | rs2229593 | T | C | -0.2655 | 0.0406 | 42.8 | 0.005822 | 0.032673 |
| mcp1 | rs62246130 | T | C | -0.2884 | 0.032 | 81.2 | -0.00166 | 0.015961 |
| mcp1 | rs2228467 | T | C | 0.2637 | 0.0291 | 82.1 | -0.00176 | 0.021682 |
| mcp1 | rs34390431 | A | G | 0.0931 | 0.0167 | 31.1 | 0.000244 | 0.010394 |
